# Supplementary material for: Learning can be detrimental for a parasitic wasp
Source: PubMed Central journal article supplement (PMC7987188; doi:10.1371/journal.pone.0238336), 2021-03-23

# R\_script\_T.podisi

This script, with processed data, was used to generate figures and statistics reported in Bertoldi et al., "Learning can be detrimental for a parasitic wasp", submitted to Biology Letters

Load required packages; load and format the dataset

```
rm(list=ls())
library(knitr)
library(dplyr)
library(emmeans)
library(multcomp)
library(multcompView)
library(sciplot)
library(bestNormalize)
library(ggplot2)
dat <- read.csv("Tpodisi_data.csv", sep=";", header=T)
dat$comb <- factor(dat$comb, levels=c("HH_naï", "HH_exp", "PM_naï", "PM_exp"))
```

## Evaluate the effect of the host species and experience level on the total residence time

```
dat$y <- predict(bestNormalize((dat$tot+1), standardize=FALSE)$other_transforms$boxcox)
model <- glm(y ~ sp*tr, family=gaussian(link="identity"), data=dat)
modelr <- glm(y ~ 1, family=gaussian(link="identity"), data=dat)
ms <- anova(modelr, model, test="F")
ms$F[2] #F-value
```

```
## [1] 24.96143
```

```
ms$Pr[2] #Significance
```

```
## [1] 2.927245e-13
```

```
me <- emmeans(model, ~sp*tr)
kable(multcomp::cld(me, Letters=LETTERS, sort=TRUE), caption = "Total residence time of T. podisi in the different experimental treatments. Mean values followed by the same letter are not significantly different for P = 0.05 according to GLMs with Gaussian distribution (on Box-Cox transformed response variable) followed by Tukey HSD multiple comparisons procedure.")
```

Total residence time of T. podisi in the different experimental treatments. Mean values followed by the same letter are not significantly different for P = 0.05 according to GLMs with Gaussian distribution (on Box-Cox transformed response variable) followed by Tukey HSD multiple comparisons procedure.

|   | sp | tr  | emmean   | SE        | df  | asyp.LCL | asyp.UCL | .group |
|---|----|-----|----------|-----------|-----|----------|----------|--------|
| 3 | HH | naï | 5.416239 | 0.4028551 | Inf | 4.626658 | 6.205821 | A      |
| 1 | HH | exp | 7.870245 | 0.3885479 | Inf | 7.108705 | 8.631785 | B      |

|   | sp | tr  | emmean    | SE        | df  | asymp.LCL | asymp.UCL | .group |
|---|----|-----|-----------|-----------|-----|-----------|-----------|--------|
| 4 | PM | naï | 9.238242  | 0.4079872 | Inf | 8.438602  | 10.037882 | BC     |
| 2 | PM | exp | 10.029933 | 0.4079872 | Inf | 9.230293  | 10.829573 | C      |

```
cat(" \n")
```

Fig. 1: box plot for total residence time

```
tiff(paste("Fig.1_Residence_time.tiff",sep=""), units = "in", width=8, height=0.6125*8, res=500)
bp <- ggplot(dat, aes(x = comb, y = tot, fill = "grey20"))
bp <- bp + geom_boxplot(notch = F, outlier.shape=NA, width=0.5)
bp <- bp + ylim(c(0,700))
my_colors <- c("#999999", "#999999", "#999999", "#999999")
bp <- bp + scale_fill_manual(values=my_colors)
bp <- bp + labs(title = italic("T. podisi")~ "residence time", x=" ", y = "Total residence time (s)")
bp <- bp + theme_bw()
bp<-bp+ theme(panel.grid.major = element_blank(), panel.grid.minor = element_blank(),
panel.background = element_blank(), axis.line = element_line(colour = "black"))
bp <- bp + theme(legend.position="none")
bp <- bp + theme(axis.text.x = element_text(colour="black",size=13,angle=0,hjust=.5,vjust=.5,
face="plain"),
axis.text.y = element_text(colour = "black",size=11,angle=0,hjust=1,vjust=.4,face="plain"),
axis.title.x = element_text(colour="black",size=15,angle=0,hjust=.5,vjust=0,face="plain"),
axis.title.y = element_text(colour="black",size=15,angle=90,hjust=.5,vjust=2.5,face="plain"),
plot.title = element_text(size=18, face = "bold", hjust = 0.5))
comb.summarized <- dat %>% group_by(comb) %>% summarize(Max.tot=max(tot))
bp<-bp+geom_text(data=comb.summarized,aes(x=comb,y=50+Max.tot,label=c("c","b","ab","a")),vjust=0)
bp <- bp + geom_point(position = position_jitter(width = 0.03))
bp
dev.off()
```

```
## png
## 2
```

```
bp
```

## *T. podisi* residence time

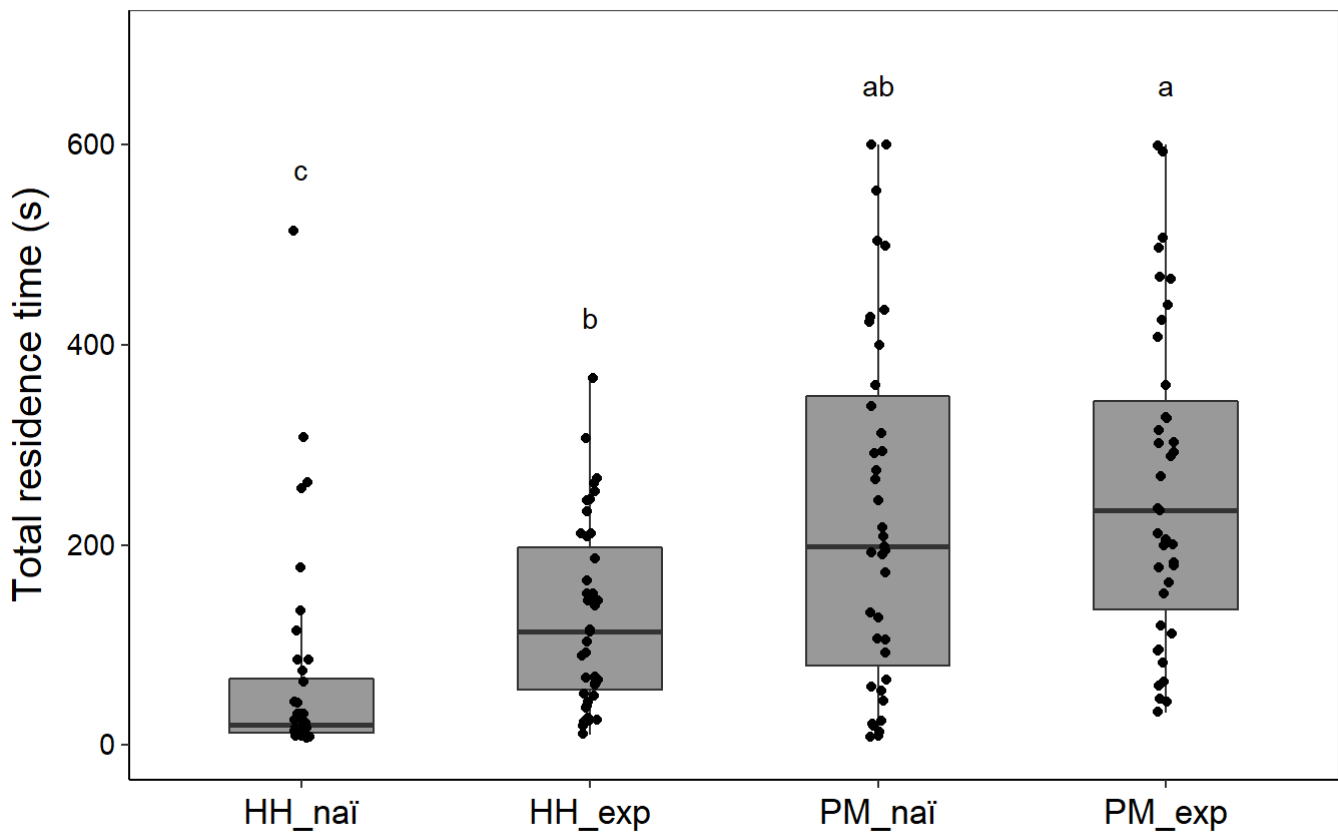

## Evaluate the effect of the host species and experience level on the number of re-encounters

```
dat$y<-dat$re_enc
model <- glm(y ~ sp*tr, family=poisson,data=dat)
modelr <- glm(y ~ 1, family=poisson,data=dat)
ms<-anova(modelr,model, test="Chisq")
ms$Deviance[2] #Deviance difference
```

```
## [1] 74.34099
```

```
ms$Pr[2] #Significance
```

```
## [1] 5.015811e-16
```

```
me <- emmeans(model, ~sp*tr)
kable(multcomp::cld(me, Letters=LETTERS, sort=TRUE),caption = "Number of re-encounters of T. podisi with the contaminated area in the different experimental treatments. Mean values followed by the same letter are not significantly different for P = 0.05 according to GLMs with Poisson distribution followed by Tukey HSD multiple comparisons procedure.")
```

Number of re-encounters of *T. podisi* with the contaminated area in the different experimental treatments. Mean values followed by the same letter are not significantly different for  $P = 0.05$  according to GLMs with Poisson distribution followed by Tukey HSD multiple comparisons procedure.

|   | sp | tr  | emmean     | SE        | df  | asympt.LCL | asympt.UCL | .group |
|---|----|-----|------------|-----------|-----|------------|------------|--------|
| 3 | HH | naï | -2.5902672 | 0.5773498 | Inf | -3.7218519 | -1.4586824 | A      |
| 1 | HH | exp | -0.1776812 | 0.1666666 | Inf | -0.5043418 | 0.1489795  | B      |
| 4 | PM | naï | -0.0259755 | 0.1622214 | Inf | -0.3439236 | 0.2919727  | B      |
| 2 | PM | exp | 0.5411310  | 0.1221694 | Inf | 0.3016833  | 0.7805787  | C      |

```
cat(" \n")
```

Fig. 2: box plot for number of re-encounters

```
tiff(paste("Fig.2_Re-encounters.tiff",sep=""), units = "in", width=8, height=0.6125*8, res=500)
bp <- ggplot(dat, aes(x = comb, y = re_enc, fill = "grey20"))
bp <- bp + geom_boxplot(notch = F, outlier.shape=NA, width=0.5)
bp <- bp + ylim(c(0,6.5))
my_colors <- c("#999999", "#999999", "#999999", "#999999")
bp <- bp + scale_fill_manual(values=my_colors)
bp <- bp + labs(title = italic("T. podisi")~ "re-encounters with host traces", x=" ", y = "Number of re-encounters")
bp <- bp + theme_bw()
bp<-bp+ theme(panel.grid.major = element_blank(), panel.grid.minor = element_blank(),
panel.background = element_blank(), axis.line = element_line(colour = "black"))
bp <- bp + theme(legend.position="none")
bp <- bp + theme(axis.text.x = element_text(colour="black",size=13,angle=0,hjust=.5,vjust=.5,
face="plain"),
axis.text.y = element_text(colour = "black",size=11,angle=0,hjust=1,vjust=0.4,face="plain"),
axis.title.x = element_text(colour="black",size=15,angle=0,hjust=.5,vjust=0,face="plain"),
axis.title.y = element_text(colour="black",size=15,angle=90,hjust=.5,vjust=2.5,face="plain"),
plot.title = element_text(size=18, face = "bold", hjust = 0.5))
comb.summarized <- dat %>% group_by(comb) %>% summarize(Max.re_enc=max(re_enc))
bp<-bp+geom_text(data=comb.summarized,aes(x=comb,y=0.7+Max.re_enc,label=c("c","b","b","a")),vjust=0)
bp <- bp + geom_point(position = position_jitter(width = 0.03))
bp
dev.off()
```

```
## png
## 2
```

```
bp
```

*T. podisi* re-encounters with host traces

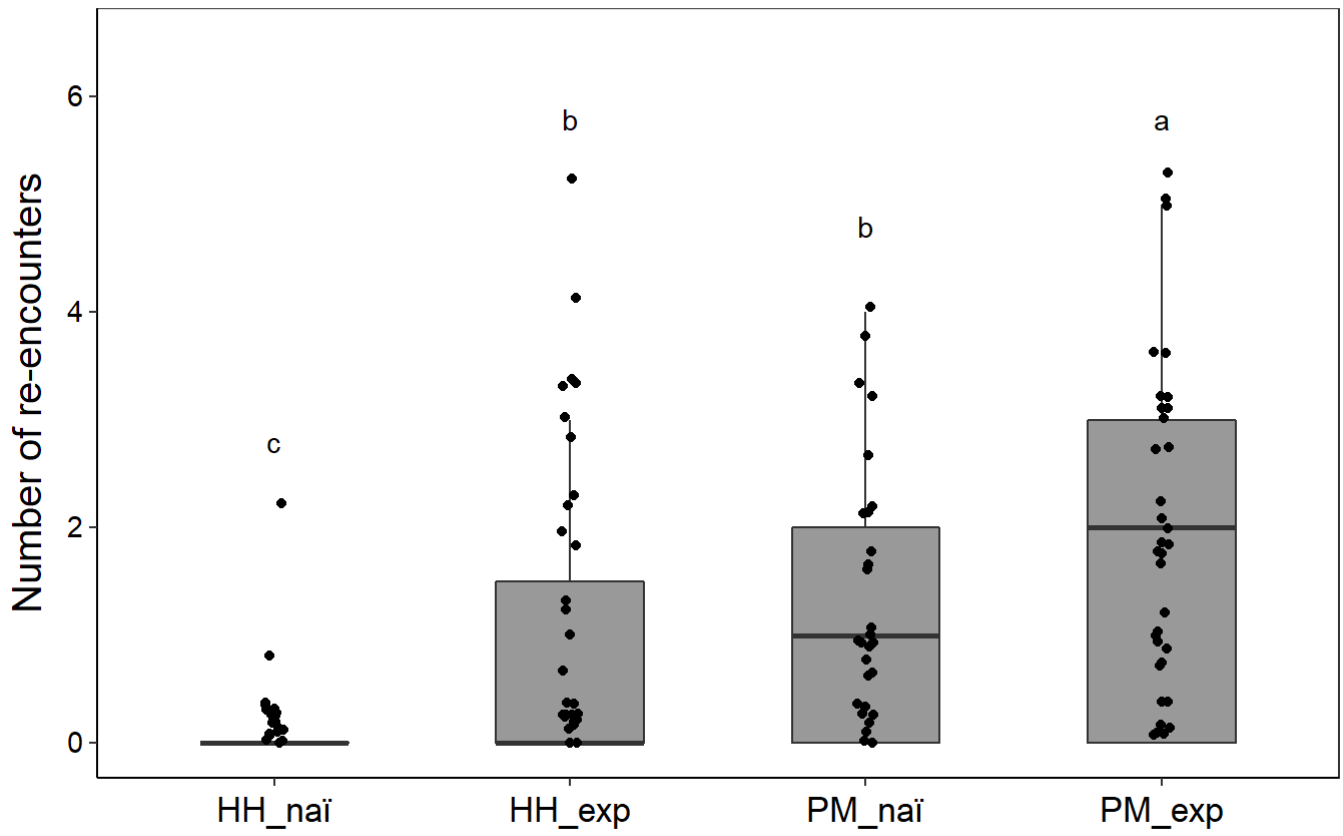

Supplement: pone.0238336.s001.pdf [file pone.0238336.s001.pdf]
